# Supplementary material for: Draft genome sequence of Karnal bunt pathogen (Tilletia indica) of wheat provides insights into the pathogenic mechanisms of quarantined fungus
Source: PLoS One. 2017 Feb 2;12(2):e0171323. doi: 10.1371/journal.pone.0171323 (PMC5289553; doi:10.1371/journal.pone.0171323)
Supplement: S7 Table — (XLSX) [file pone.0171323.s007.xlsx]

## Sheet: Sheet1
S7 Table Proteases in T.indica genome, classed by MEROPS peptidase database
MEROPS family
Aspartic peptidases	23
A01: pepsin	1
A11: endopeptidase	21
A22: presenilin	1
Cysteine peptidases	283
C01: papain	43
C02: calpain	25
C12: ubiquitinyl hydrolase	2
C13: legumain	7
C14: caspase	14
C15: pyroglutamyl-peptidase I	11
C19: ubiquitin-specific peptidase	92
C26: gamma-glutamyl hydrolase	1
C40: dipeptidyl-peptidase	69
C44: amidophosphoribosyltransferase	0
C45: aminopenicillanic acid acyl-transferase	0
C48: Ulp1 peptidase	0
C50: separase	0
C54: autophagin-1	0
C56: PfpI peptidase	7
C59: penicillin V acylase	4
C65: otubain-1	2
C69: dipeptidase A	6
C85: DUBA deubiquitinylating enzyme	0
C88: OTU1 peptidase	0
Glutamic peptidases	0
G01: scytalidoglutamic peptidase	0
Metallo peptidases	194
M01: aminopeptidase N	28
M03: thimet oligopeptidase	3
M04: thermolysin	0
M06: immune inhibitor A peptidase	1
M10: matrix metallopeptidase	35
M12: astacin	1
M13: neprilysin	4
M14: carboxypeptidase	60
M16: pitrilysin	1
M18: aminopeptidase I	0
M19: membrane dipeptidase	0
M20: glutamate carboxypeptidase	9
M22: O-sialoglycoprotein peptidase	0
M23: beta-lytic metallopeptidase	0
M24: methionyl aminopeptidase 1	26
M28: aminopeptidase S	5
M35: deuterolysin	0
M36: fungalysin	2
M38: isoaspartyl dipeptidase	0
M41: FtsH peptidase	0
M43: metallopeptidase MEP1	1
M48: Ste24 peptidase	2
M49: dipeptidyl-peptidase III	9
M50: S2P protease	0
M54: archaelysin	3
M60: enhancin	2
M67: Poh1 peptidase	0
M76: Atp23 peptidase	2
M77: tryptophanyl aminopeptidase	0
M79: prenyl peptidase 2	0
M80: Wss1 peptidase	0
M81: microcystinase MlrC	0
Serine peptidase	108
S01: trypsin	36
S08: subtilisin	0
S09: prolyl oligopeptidase	0
S10: carboxypeptidase Y	0
S12: D-Ala-D-Ala carboxypeptidase B	0
S14: peptidase Clp	20
S15: Xaa-Pro dipeptidyl-peptidase	4
S16: Lon-A peptidase	48
S26: signal peptidase I	0
S28: lysosomal Pro-Xaa carboxypeptidase	0
S33: prolyl aminopeptidase	0
S51: dipeptidase E	0
S53: sedolisin	0
S54: rhomboid-1	0
S58: DmpA aminopeptidase	0
S59: nucleoporin 145	0
S66: murein tetrapeptidase LD-carboxypeptidase	0
Threonine peptidase	25
T01: proteasome	0
T02: glycosylasparaginase	1
T03: gamma-glutamyltransferase 1	16
T05: ornithine acetyltransferase	8
Total	633
